# Supplementary material for: Use of Administrative Data to Identify Off-Label Use of Second-Generation Antipsychotics in a Medicaid Population
Source: Atypon-hosted journal article supplement (doi:10.1176/appi.ps.005482012), 2013-09-03
Supplement: 1236_ds001.pdf [file 1236_ds001.pdf]

Online Appendix:

**Table 1:** agreement in diagnoses between ehr coded (rows) and manual review of provider narrative (columns) in random 25% sample (n=200)

| EHR          | Schizophrenia |     | Bipolar disorder |     | Depression |     |
|--------------|---------------|-----|------------------|-----|------------|-----|
|              | +             | —   | +                | —   | +          | —   |
| +            | 42            | 0   | 56               | 0   | 39         | 0   |
| —            | 11            | 147 | 16               | 128 | 45         | 116 |
| <b>kappa</b> | .85           |     | .82              |     | .50        |     |

**Table 2:** diagnostic accuracy of 25% random sample (n=200) without additional information provided by manual review

| Administrative Data | Schizophrenia |        | Bipolar disorder |          | Depression |     |          |        |     |
|---------------------|---------------|--------|------------------|----------|------------|-----|----------|--------|-----|
|                     | No            | Yes    | No               | Yes      | No         | Yes |          |        |     |
| No                  | 141           | 11     | 117              | 8        | 123        | 17  |          |        |     |
| Yes                 | 17            | 31     | 27               | 48       | 38         | 22  |          |        |     |
| Total Cases         | 158           | 42     | 144              | 56       | 161        | 39  |          |        |     |
|                     | estimate      | 95% CI |                  | estimate | 95% CI     |     | estimate | 95% CI |     |
| Sensitivity         | 89%           | 83%    | 94%              | 81%      | 74%        | 87% | 76%      | 69%    | 83% |
| Specificity         | 74%           | 58%    | 86%              | 86%      | 74%        | 94% | 56%      | 40%    | 72% |
| PPV                 | 93%           | 87%    | 96%              | 94%      | 88%        | 97% | 88%      | 81%    | 93% |
| NPV                 | 65%           | 50%    | 78%              | 64%      | 52%        | 75% | 37%      | 25%    | 50% |

**Table 3:** diagnostic accuracy of 25% random sample (n=200) with additional information provided by manual review

| Administrative Data | Schizophrenia |        | Bipolar disorder |          | Depression |     |          |        |     |
|---------------------|---------------|--------|------------------|----------|------------|-----|----------|--------|-----|
|                     | No            | Yes    | No               | Yes      | No         | Yes |          |        |     |
| No                  | 138           | 14     | 110              | 15       | 95         | 45  |          |        |     |
| Yes                 | 9             | 39     | 15               | 57       | 21         | 39  |          |        |     |
| Total Cases         | 147           | 53     | 128              | 72       | 116        | 84  |          |        |     |
|                     | estimate      | 95% CI |                  | estimate | 95% CI     |     | estimate | 95% CI |     |
| Sensitivity         | 94%           | 89%    | 97%              | 86%      | 79%        | 91% | 82%      | 74%    | 88% |
| Specificity         | 74%           | 60%    | 85%              | 79%      | 68%        | 88% | 46%      | 36%    | 58% |
| PPV                 | 91%           | 85%    | 95%              | 88%      | 81%        | 93% | 68%      | 59%    | 76% |
| NPV                 | 81%           | 67%    | 91%              | 76%      | 65%        | 85% | 65%      | 52%    | 77% |

**Table 4:** concordance of administrative claims for determining absence of long-standing fda indications in those less than 19 years of age (n=244)

| Administrative Data | Medical Record |        |                  |          |                                   |      |          |        |     |
|---------------------|----------------|--------|------------------|----------|-----------------------------------|------|----------|--------|-----|
|                     | Schizophrenia  |        | Bipolar disorder |          | Schizophrenia or bipolar disorder |      |          |        |     |
| No                  | No             | Yes    | No               | Yes      | No                                | Yes  |          |        |     |
| No                  | 234            | 2      | 193              | 3        | 185                               | 5    |          |        |     |
| Yes                 | 8              | 0      | 28               | 20       | 34                                | 20   |          |        |     |
| Total               | 242            | 2      | 221              | 23       | 219                               | 25   |          |        |     |
|                     | Estimate       | 95% CI |                  | Estimate | 95% CI                            |      | estimate | 95% CI |     |
| Prevalence          | 99%            | 97%    | 100%             | 91%      | 86%                               | 94%  | 65%      | 61%    | 70% |
| Sensitivity         | 97%            | 94%    | 99%              | 87%      | 82%                               | 91%  | 85%      | 79%    | 89% |
| Specificity         | 0%             | 0%     | 84%              | 87%      | 66%                               | 97%  | 80%      | 59%    | 93% |
| PPV                 | 99%            | 97%    | 100%             | 99%      | 96%                               | 100% | 97%      | 94%    | 99% |
| NPV                 | 0%             | 0%     | 37%              | 42%      | 28%                               | 57%  | 37%      | 24%    | 51% |

**Table 5: concordance of administrative claims for determining absence of long-standing fda indications in those greater than 18 years of age (n=544)**

|                     | Medical Record |        |     |                  |        |     |                                   |        |     |
|---------------------|----------------|--------|-----|------------------|--------|-----|-----------------------------------|--------|-----|
|                     | Schizophrenia  |        |     | Bipolar disorder |        |     | Schizophrenia or bipolar disorder |        |     |
| Administrative Data | No             | Yes    |     | No               | Yes    |     | No                                | Yes    |     |
| <b>No</b>           | 426            | 12     |     | 370              | 9      |     | 282                               | 16     |     |
| <b>Yes</b>          | 59             | 47     |     | 116              | 49     |     | 150                               | 96     |     |
| <b>Total</b>        | 485            | 59     |     | 486              | 58     |     | 432                               | 112    |     |
|                     | Estimate       | 95% CI |     | Estimate         | 95% CI |     | estimate                          | 95% CI |     |
| <b>Prevalence</b>   | 89%            | 86%    | 92% | 89%              | 86%    | 92% | 79%                               | 76%    | 83% |
| <b>Sensitivity</b>  | 88%            | 85%    | 91% | 76%              | 72%    | 80% | 95%                               | 91%    | 70% |
| <b>Specificity</b>  | 80%            | 67%    | 89% | 85%              | 73%    | 93% | 86%                               | 78%    | 92% |
| <b>PPV</b>          | 97%            | 95%    | 99% | 98%              | 96%    | 99% | 95%                               | 91%    | 97% |
| <b>NPV</b>          | 44%            | 35%    | 54% | 30%              | 23%    | 37% | 39%                               | 33%    | 45% |
